# Supplementary material for: Insight into Molecular Mechanism for Activin A-Induced Bone Morphogenetic Protein Signaling
Source: PubMed Central journal article supplement (PMC7555472; doi:10.3390/ijms21186498), 2020-09-05

## Supplementary Material

**Supplementary Table 1:** Oligonucleotides used in the study

| Genes                          | Oligonucleotides                                                                                               |
|--------------------------------|----------------------------------------------------------------------------------------------------------------|
| Human ALK2 <sup>R206H</sup>    | 5'-CAAAGAACAGTGGCTCACCAGATTACACTGTTG-3' (forward)<br>5'-AACAGTGTAATCTGGTGAGCCACTGTTCTTTG-3' (reverse)          |
| Human ActRIIA <sup>K219R</sup> | 5'-CGAATATGTGGCTGTCAGAATATTTCCAATACAGGAC-3' (forward)<br>5'-GTCCTGTATTGGAAATATTCTGACAGCCACATATTCG-3' (reverse) |
| Human ActRIIB <sup>K217R</sup> | 5'-GAATGACTTTGTAGCTGTCAGGATCTTCCCCTCCAG-3' (forward)<br>5'-CTGGAGTGGGAAGATCCTGACAGCTACAAAGTCATTC-3' (reverse)  |
| Human GAPDH                    | 5'-GGTGTGAACCATGAGAAGTATGA-3' (forward)<br>5'-GTCCTTCCACGATACCAAAG-3' (reverse)                                |
| Mouse GAPDH                    | 5'-CCCATCACCATCTTCCAGGAGC -3' (forward)<br>5'-CCAGTGAGCTTCCCGTTCAGC -3' (reverse)                              |
| Human ALK1                     | 5'-CAACAGTCCAGAGAAGCCTAAA-3' (forward)<br>5'-CTCACACTACCTCTACCCAGATA-3' (reverse)                              |
| Human ALK2                     | 5'-GTGACCAAGAGCCTGCATTA-3' (forward)<br>5'-TTGGGCTTCTCATCTTCCATAC-3' (reverse)                                 |
| Human ALK3                     | 5'-AGTGGGTCTGGACTACCTTTA-3' (forward)<br>5'-GCCCATCCATACTTCTCCATATC -3' (reverse)                              |
| Human ALK6                     | 5'-CCTATACACCACAGGGCTTTAC-3' (forward)<br>5'-CGAGGTCTGGTTTCTTGTCTT-3' (reverse)                                |
| Mouse ALK2                     | 5'-CCTGGAAGTTGGCCTTATCA -3' (forward)<br>5'-GTGGTGATGAGCCCTTCAAT -3' (reverse)                                 |
| Mouse FKBP12                   | 5'-TGTTCCGTCCTCAGCTTTG -3' (forward)<br>5'-GTTAACCCATCGCTTGTGCT-3' (reverse)                                   |
| Mouse Id1                      | 5'-AGGTGAACGTCCTGCTCTA -3' (forward)<br>5'-GATCTCCACCTTGCTCACTTT-3' (reverse)                                  |
| Mouse Id2                      | 5'-CTACTCCAAGCTCAAGGAACTG-3' (forward)<br>5'-GATCTGCAGGTCCAAGATGTAA-3' (reverse)                               |

**Supplementary Figure 1:** FK506 at  $10^{-10}$  M concentration is unable to activate ALK2<sup>WT</sup> for the activin A-induced BMP signaling.

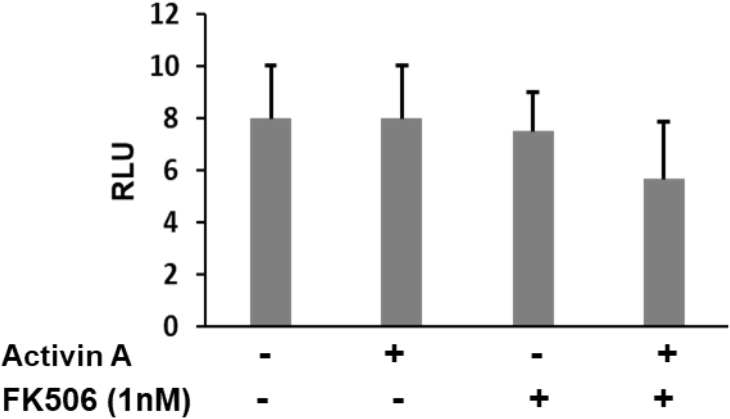

**Supplementary Figure 2:** Overexpression of ALK1, ALK3 and ALK6 in Figure 4 was confirmed by RT-PCR.

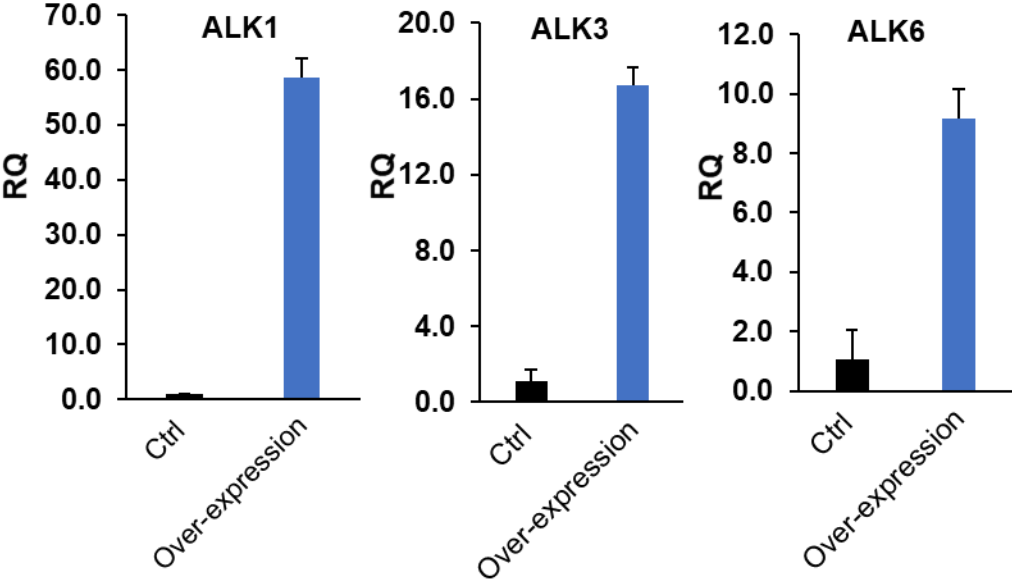

**Supplementary Figure 3:** Overexpression of kinase-deficient ActR-IIA<sup>K219R</sup>, ActR-IIB<sup>K217R</sup> and BMPR-2<sup>K230R</sup> significantly down-regulated activin-A-induced BMP signaling via ALK2<sup>WT</sup> upon FKBP12 dissociation in C2C12BRA cells as well.

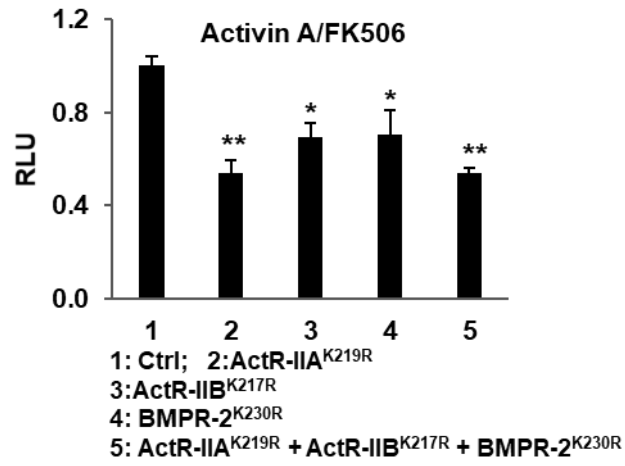

Supplement: ijms-21-06498-s001.pdf [file ijms-21-06498-s001.pdf]
